# Supplementary material for: Enhanced Integrin Activation of PLD2-Deficient Platelets Accelerates Inflammation after Myocardial Infarction
Source: PubMed Central journal article supplement (PMC7247352; doi:10.3390/ijms21093210), 2020-05-01
Supplement: ijms-21-03210-s001.pdf [file ijms-21-03210-s001.pdf]

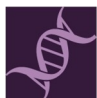

1 *Type of the Paper: Article*

2 **Enhanced integrin activation of PLD2 deficient**  
3 **platelets accelerates inflammation after myocardial**  
4 **infarction**

5 Aglaia Maria Klose <sup>1</sup>, Meike Klier <sup>1</sup>, Simone Gorresen <sup>2</sup>, and Margitta Elvers <sup>1,\*</sup>

6

7 **Supplemental Data**

8

(A)

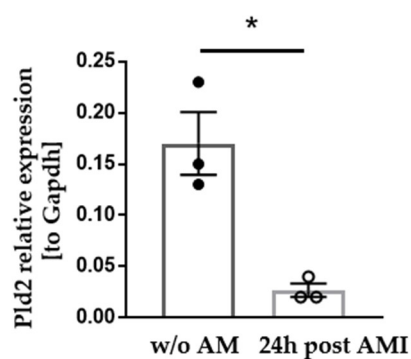

9

10

11 **Suppl.-Figure S1.** Quantification of mRNA expression of Pld2 in the left ventricle 24 hours after I/R  
12 injury in mice compared with healthy controls as determined by quantitative RT-PCR, n=3. (A) Bar  
13 graphs depict mean values  $\pm$  SEM. Statistical analysis was performed by two-tailed Student's t-test. \* p  
14 < 0.05. AMI = acute myocardial infarction.

15

16

17

18

19

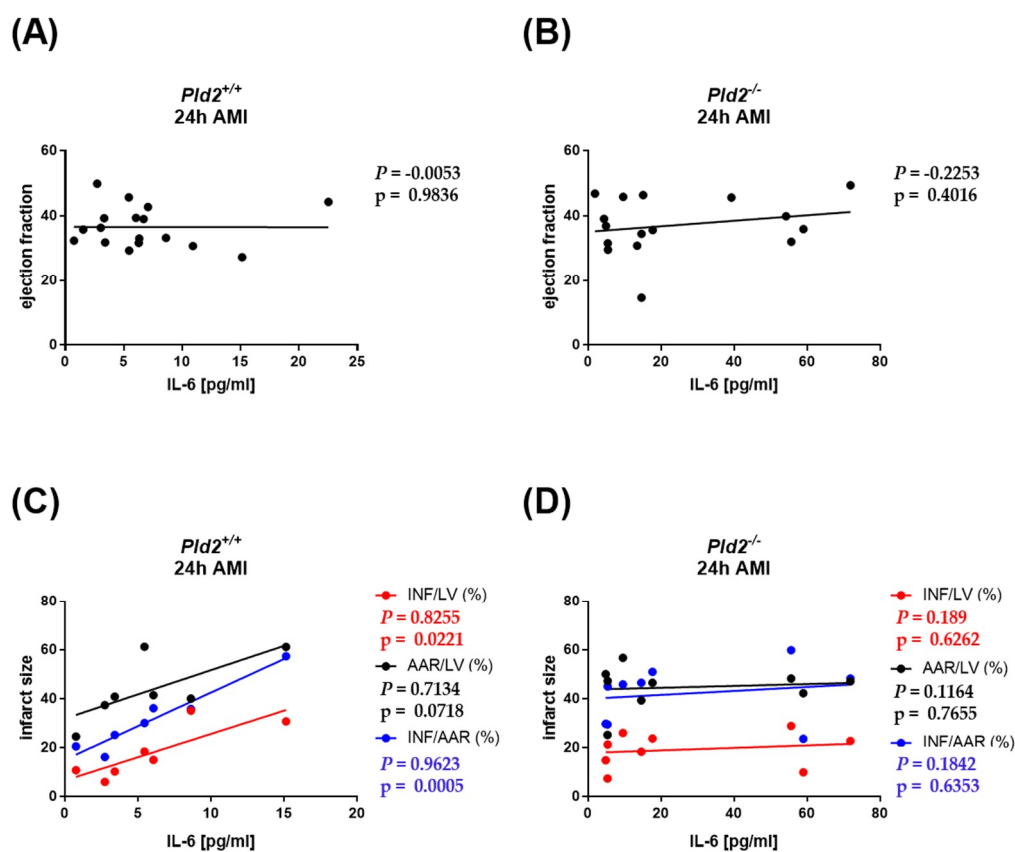

20

21 **Suppl.-Figure S 2.** Spearman correlation coefficient was determined as indicated.  
 22 Spearman correlation coefficient ( $\rho$ ) between plasma levels of IL-6 and ejection fraction (A-B)  
 23 and IL-6 and infarct size (C-D) of *Pld2*<sup>+/+</sup> and *Pld2*<sup>-/-</sup> mice was determined.  $\rho = -1$  indicates  
 24 strong negative correlation,  $\rho = 0$  indicates no correlation and  $\rho = +1$  indicates strong positive  
 25 correlation; pP-values as indicated. AMI = acute myocardial infarction.
